# Supplementary material for: Brassinosteroid Supplementation Alleviates Chromium Toxicity in Soybean (Glycine max L.) via Reducing Its Translocation
Source: MDPI journal article supplement (doi:10.3390/plants11172292), 2022-09-01
Supplement: s1 [file s1]

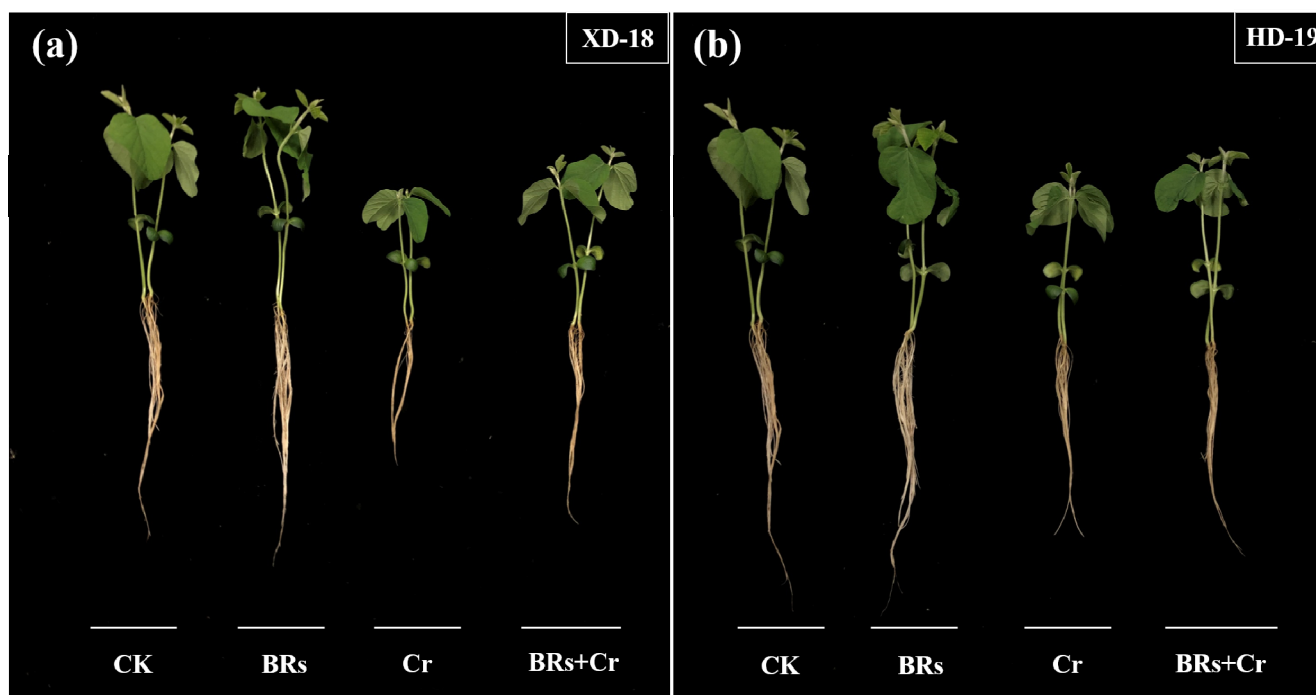

**Figure S1.** Effect of EBL foliar application on the visual appearance of soybean seedlings under chromium (Cr) toxicity. (a) Cr-induced phenotypical changes on the XD-18 cultivar and mitigation effect of EBL under Cr stress. (b) Cr-induced phenotypical changes on the HD-19 cultivar and mitigation effect of EBL under Cr exposure.

**Table S1.** Primers information

| Gene Name          | Description                                   | Forward primer    | Reverse primer        |
|--------------------|-----------------------------------------------|-------------------|-----------------------|
|                    |                                               | GCGCTTAGAAGAATTGA |                       |
| <i>GmHMA3</i>      | Zinc-transporting ATPase                      | AGGGAT            | GCCTTGCTTGATTCAAGTGCC |
|                    |                                               | CGCTCTGAGACTGAGCG |                       |
| <i>GmHMA8</i>      | Chloroplast copper-<br>translocating P-ATPase | ATT               | CTCCATAAGCGGTCCGTGAG  |
|                    |                                               | GGTCTTCTAATTGCGGT | TGACGATCCACTTCTCCTTT  |
| <i>GmSULTR1;2b</i> | High-affinity sulfate transporter             | GGC               | GG                    |
|                    |                                               | AAGGCTTGCTATCAAGG | CTGATACTTGTTGCCTGCTG  |
| <i>GmhPCS1</i>     | Phytochelatin synthase 1<br>(PCS1)            | AAGAGG            | C                     |
|                    |                                               | ATCTTGACTGAGCGTGG |                       |
| <i>ACT11</i>       | Cytoskeletal structural protein               | TTATTCC           | GCTGGTCCTGGCTGTCTCC   |

**Table S2.** Foliar application of BRs improves the chlorophyll fluorescence level such as net photosynthetic rate (Pn), transpiration rate (Tr), stomatal conductance (gs), CO<sub>2</sub> assimilation rate (Ci), and maximum quantum yield of PSII photochemistry (Fv/Fm) in two different soybean cultivars under chromium (Cr) stress

| Genotypes | Treatments | Net photosynthetic rate | SPAD values | Transpiration rate | Stomatal conductance | CO <sub>2</sub> assimilation rate | Fv/Fm       |
|-----------|------------|-------------------------|-------------|--------------------|----------------------|-----------------------------------|-------------|
| XD-18     | CK         | 8.95±0.12a              | 34.7±1.43b  | 5.37±0.11b         | 0.36±0.02b           | 433.67±5.23b                      | 0.56±0.02c  |
|           | BRs        | 9.01±0.18a              | 35.6±1.08ab | 5.49±0.09ab        | 0.38±0.16a           | 435.97±8.07ab                     | 0.59±0.01bc |
|           | Cr         | 3.89±0.14e              | 13.6±0.78f  | 2.01±0.08f         | 0.16±0.01f           | 202.43±11.38e                     | 0.27±0.02g  |
|           | BRs+Cr     | 6.32±0.29c              | 26.8±0.23d  | 3.58±0.07d         | 0.26±0.02d           | 298.76±12.62d                     | 0.43±0.01e  |
| HD-19     | CK         | 8.97±0.05a              | 35.3±0.34ab | 5.55±0.16a         | 0.37±0.09ab          | 436.31±11.43ab                    | 0.63±0.01ab |
|           | BRs        | 9.04±0.11a              | 36.1±0.65a  | 5.57±0.07a         | 0.38±0.08a           | 439.34±3.42a                      | 0.66±0.03a  |
|           | Cr         | 5.54±0.13d              | 21.9±0.93e  | 2.91±0.11e         | 0.21±0.01e           | 256.31±6.75e                      | 0.35±0.03f  |
|           | BRs+Cr     | 7.49±0.19b              | 29.7±1.54c  | 4.34±0.18c         | 0.29±0.03c           | 334.26±15.74c                     | 0.49±0.02d  |

The same letters within a column designate there was no significant difference at a 95% probability level at the  $p < 0.05$  level according to the LSD test, correspondingly.
